# Supplementary material
Source: Springer Nature journal article supplement (https://www.springermedizin.de/resource/supplementary/13018_2011_346_MOESM1_ESM.pdf/9636876)

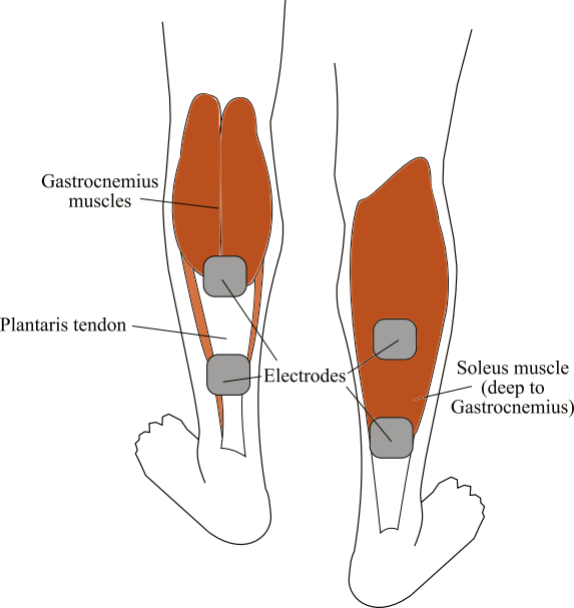

Supplement: MOESM1 [file 9636876]
